# Supplementary material
Source: publisher figshare collection journal article supplement (https://tandf.figshare.com/articles/dataset/_/1306950)
Supplement: Supplementary file 1 [file 1]

# **Temporal Disaggregation: Methods, Information Loss, and Diagnostics**

## **Supplementary Materials**

Duk B. Jun

KAIST, College of Business, Seoul, Republic of Korea

([dbjun@business.kaist.ac.kr](mailto:dbjun@business.kaist.ac.kr))

Jihwan Moon

Warrington College of Business, University of Florida, Gainesville, FL 32611

([mihxna@ufl.edu](mailto:mihxna@ufl.edu))

Sungho Park

W.P. Carey School of Business, Arizona State University, Tempe, AZ 85287

([spark104@asu.edu](mailto:spark104@asu.edu))

## APPENDIX A: OBSERVABILITY CONDITION

A discrete-time system,

$$\begin{aligned}\mathbf{y}_t &= \mathbf{H}_{m \times n} \mathbf{x}_t \\ \mathbf{x}_t &= \mathbf{F}_{n \times n} \mathbf{x}_{t-1}\end{aligned}\tag{1}$$

is completely observable if and only if the observability matrix,

$$\mathbf{\Omega} = \begin{pmatrix} \mathbf{H} \\ \mathbf{HF} \\ \mathbf{HF}^2 \\ \vdots \\ \mathbf{HF}^{n-1} \end{pmatrix} \text{ has rank } n \text{ (Luenberger, 1979).}$$

Observability is related to the ability to infer what the model is doing in terms of the unique estimation of state variables from a given sequence of observing time series (see Joo and Jun 1997; Jun et al. 2012). The observability matrix must be nonsingular to prevent spurious decomposition. We aim to prove that  $c$  must be no more than  $p+1$  to satisfy the observability condition in  $\text{ARC}(p, c)$ .

### A.1 $\text{ARC}(1, 2)$

$$\mathcal{E}_t^c = \begin{pmatrix} 1 & 1 \end{pmatrix} \begin{pmatrix} \mathcal{E}_{2t} \\ \mathcal{E}_{2t-1} \end{pmatrix}.$$

$$\begin{pmatrix} \mathcal{E}_{2t} \\ \mathcal{E}_{2t-1} \end{pmatrix} = \begin{pmatrix} \phi^2 & 0 \\ \phi & 0 \end{pmatrix} \begin{pmatrix} \mathcal{E}_{2t-2} \\ \mathcal{E}_{2t-3} \end{pmatrix} + \begin{pmatrix} 1 & \phi \\ 0 & 1 \end{pmatrix} \begin{pmatrix} \eta_{2t} \\ \eta_{2t-1} \end{pmatrix}.$$

$$\mathbf{\Omega} = \begin{pmatrix} 1 & 1 \\ \phi(\phi+1) & 0 \end{pmatrix}.$$

Because  $|\mathbf{\Omega}| \neq 0$ , the observability condition is satisfied.

## A.2 ARC( $p, 2$ )

For  $p \geq 2$ ,

$$\mathcal{E}_i^c = (1 \quad 1 \quad \overbrace{0 \quad \cdots \quad 0}^{p-2}) \begin{pmatrix} \mathcal{E}_{2t} \\ \mathcal{E}_{2t-1} \\ \vdots \\ \mathcal{E}_{2t-p+1} \end{pmatrix} = \mathbf{H} \begin{pmatrix} \mathcal{E}_{2t} \\ \mathcal{E}_{2t-1} \\ \vdots \\ \mathcal{E}_{2t-p+1} \end{pmatrix}, \text{ where } \mathbf{H} = (1 \quad 1 \quad \overbrace{0 \quad \cdots \quad 0}^{p-2}).$$

$$\begin{pmatrix} \mathcal{E}_{2t} \\ \mathcal{E}_{2t-1} \\ \vdots \\ \mathcal{E}_{2t-p+1} \end{pmatrix} = \begin{pmatrix} \phi_1 & \phi_2 & \cdots & \phi_p \\ 1 & 0 & \cdots & 0 \\ \vdots & \ddots & \ddots & \vdots \\ 0 & \cdots & 1 & 0 \end{pmatrix} \begin{pmatrix} \mathcal{E}_{2t-1} \\ \mathcal{E}_{2t-2} \\ \vdots \\ \mathcal{E}_{2t-p} \end{pmatrix} + \begin{pmatrix} \eta_{2t} \\ 0 \\ \vdots \\ 0 \end{pmatrix} = \mathbf{F}^2 \begin{pmatrix} \mathcal{E}_{2t-2} \\ \mathcal{E}_{2t-3} \\ \vdots \\ \mathcal{E}_{2t-p-1} \end{pmatrix} + \begin{pmatrix} \mathbf{A}_{2 \times 2} & \mathbf{O}_{2 \times (p-2)} \\ \mathbf{O}_{(p-2) \times 2} & \mathbf{O}_{(p-2) \times (p-2)} \end{pmatrix} \begin{pmatrix} \eta_{2t} \\ \eta_{2t-1} \\ \vdots \\ 0 \end{pmatrix},$$

$$\text{where } \mathbf{F} = \begin{pmatrix} \phi_1 & \phi_2 & \cdots & \phi_p \\ 1 & 0 & \cdots & 0 \\ \vdots & \ddots & \ddots & \vdots \\ 0 & \cdots & 1 & 0 \end{pmatrix}, \mathbf{A} = \begin{pmatrix} 1 & \phi_1 \\ 0 & 1 \end{pmatrix}, \text{ and } \mathbf{O} \text{ is a zero matrix. } \mathbf{\Omega} = \begin{pmatrix} \mathbf{H} \\ \mathbf{H}\mathbf{F}^2 \\ \vdots \\ \mathbf{H}\mathbf{F}^{2p-2} \end{pmatrix}.$$

To prove that  $|\mathbf{\Omega}| \neq 0$ , we consider the equation  $c_1 \mathbf{H} + c_2 \mathbf{H}\mathbf{F}^2 + \cdots + c_p \mathbf{H}\mathbf{F}^{2p-2} = \mathbf{O}$ . To show that the rows of  $\mathbf{\Omega}$  are linearly independent, we aim to verify that  $c_1 = c_2 = \cdots = c_p = 0$  is the only solution of the equation for all  $(\phi_1, \phi_2, \cdots, \phi_p)$ . Suppose that there is a nonzero solution for the equation. From the equation,  $g_1(c_1, c_2, \cdots, c_p) \mathbf{v}_1 + g_2(c_1, c_2, \cdots, c_p) \mathbf{v}_2 + \cdots + g_p(c_1, c_2, \cdots, c_p) \mathbf{v}_p = \mathbf{O}_{1 \times p}$  for some  $g_1, g_2, \dots, g_p$ , where  $\mathbf{v}_1, \mathbf{v}_2, \dots, \mathbf{v}_p$  are the row vectors of  $\mathbf{F}$ . Because the determinant of  $\mathbf{F}$  is not zero, the rows of  $\mathbf{F}$  are linearly independent. Thus, given  $(\phi_1, \phi_2, \cdots, \phi_p)$ ,

$$g_i(c_1, c_2, \cdots, c_p \mid \phi_1, \phi_2, \cdots, \phi_p) = 0 \text{ for } i = 1, \dots, p.$$

The equations can be transformed into the following system of linear equations:

$$\begin{pmatrix} f_{11}(\phi_1, \cdots, \phi_p) & f_{12}(\phi_1, \cdots, \phi_p) & \cdots & f_{1p}(\phi_1, \cdots, \phi_p) \\ f_{21}(\phi_1, \cdots, \phi_p) & & \ddots & \\ \vdots & & & \vdots \\ f_{p1}(\phi_1, \cdots, \phi_p) & & \cdots & f_{pp}(\phi_1, \cdots, \phi_p) \end{pmatrix} \begin{pmatrix} c_1 \\ c_2 \\ \vdots \\ c_p \end{pmatrix} = \begin{pmatrix} 0 \\ 0 \\ \vdots \\ 0 \end{pmatrix} \text{ or simply, } \mathbf{R}\mathbf{C} = \mathbf{O}.$$

If the rank of  $\mathbf{R}$  is zero,  $\phi_i = 0$  for all  $i$ . This is a contradiction because  $\phi_p \neq 0$ ; therefore,

$1 \leq \text{rank}(\mathbf{R}) < p$ . Then, the dimension of the null space of  $\mathbf{R}$  is  $p - \text{rank}(\mathbf{R})$ , which indicates that  $p - \text{rank}(\mathbf{R})$  equations of  $\phi_1, \phi_2, \dots, \phi_p$  must be satisfied; therefore, the dimension of the space of  $(\phi_1, \phi_2, \dots, \phi_p)$  is less than  $p$  for the system to have a nonzero solution. This is a contradiction.

Consequently, a nonzero solution does not exist in general.

### A.3 ARC( $p, c$ )

*Case I*  $p+1 < c$

$$\mathcal{E}_t^c = \begin{pmatrix} 1 & \dots & 1 \end{pmatrix} \begin{pmatrix} \mathcal{E}_{ct} \\ \vdots \\ \mathcal{E}_{ct-c+1} \end{pmatrix}.$$

$$\begin{pmatrix} \mathcal{E}_{ct} \\ \vdots \\ \mathcal{E}_{ct-c+1} \end{pmatrix} = \begin{pmatrix} \phi_1 & \dots & \phi_p & \mathbf{0}_{l \times (c-p)} \\ 1 & \dots & 0 & \mathbf{0}_{l \times (c-p)} \\ \vdots & \ddots & \vdots & \vdots \\ 0 & \dots & 1 & \mathbf{0}_{l \times (c-p)} \end{pmatrix} \begin{pmatrix} \mathcal{E}_{ct-1} \\ \vdots \\ \mathcal{E}_{ct-c} \end{pmatrix} + \begin{pmatrix} \eta_{ct} \\ \vdots \\ 0 \end{pmatrix} = \mathbf{F} \begin{pmatrix} \mathcal{E}_{ct-1} \\ \vdots \\ \mathcal{E}_{ct-c} \end{pmatrix} + \begin{pmatrix} \eta_{ct} \\ \vdots \\ 0 \end{pmatrix} = \mathbf{F}^c \begin{pmatrix} \mathcal{E}_{ct-c} \\ \vdots \\ \mathcal{E}_{ct-2c+1} \end{pmatrix} + \mathbf{A} \begin{pmatrix} \eta_{ct} \\ \vdots \\ \eta_{ct-c+1} \end{pmatrix}$$

for some  $c \times c$  matrix  $\mathbf{A}$ .

$$\mathbf{\Omega} = \begin{pmatrix} 1 & \dots & 1 \\ \mathbf{B} & & \mathbf{0}_{(c-1) \times (c-p)} \end{pmatrix} \text{ for some } (c-1) \times p \text{ matrix } \mathbf{B}.$$

Thus,  $\mathbf{\Omega}$  is singular.

*Case II*  $p+1 = c$

$$\mathcal{E}_t^c = \begin{pmatrix} 1 & \dots & 1 \end{pmatrix} \begin{pmatrix} \mathcal{E}_{ct} \\ \vdots \\ \mathcal{E}_{ct-c+1} \end{pmatrix}.$$

$$\begin{pmatrix} \mathcal{E}_{ct} \\ \vdots \\ \mathcal{E}_{ct-c+1} \end{pmatrix} = \begin{pmatrix} \phi_1 & \dots & \phi_p & 0 \\ 1 & \dots & 0 & 0 \\ \vdots & \ddots & \vdots & \vdots \\ 0 & \dots & 1 & 0 \end{pmatrix} \begin{pmatrix} \mathcal{E}_{ct-1} \\ \vdots \\ \mathcal{E}_{ct-c} \end{pmatrix} + \begin{pmatrix} \eta_{ct} \\ \vdots \\ 0 \end{pmatrix} = \mathbf{F} \begin{pmatrix} \mathcal{E}_{ct-1} \\ \vdots \\ \mathcal{E}_{ct-c} \end{pmatrix} + \begin{pmatrix} \eta_{ct} \\ \vdots \\ 0 \end{pmatrix} = \mathbf{F}^c \begin{pmatrix} \mathcal{E}_{ct-c} \\ \vdots \\ \mathcal{E}_{ct-2c+1} \end{pmatrix} + \mathbf{A} \begin{pmatrix} \eta_{ct} \\ \vdots \\ \eta_{ct-c+1} \end{pmatrix}$$

for some  $c \times c$  matrix  $\mathbf{A}$ .

$$\mathbf{\Omega} = \begin{pmatrix} 1 & \cdots & 1 \\ \mathbf{B} & \mathbf{O}_{(c-1) \times 1} \end{pmatrix} \text{ for some } (c-1) \times (c-1) \text{ matrix } \mathbf{B}.$$

With the proof in Appendix A.2, we can verify that  $\mathbf{\Omega}$  is nonsingular.

*Case III*  $p+1 > c$

$$\mathbf{\varepsilon}_t^c = (\overbrace{1 \cdots 1}^c \mathbf{O}_{1 \times (p-c)}) \begin{pmatrix} \varepsilon_{ct} \\ \vdots \\ \varepsilon_{ct-p+1} \end{pmatrix}.$$

$$\begin{pmatrix} \varepsilon_{ct} \\ \vdots \\ \varepsilon_{ct-p+1} \end{pmatrix} = \begin{pmatrix} \phi_1 & \cdots & \cdots & \phi_p \\ 1 & \cdots & 0 & 0 \\ \vdots & \ddots & \vdots & \vdots \\ 0 & \cdots & 1 & 0 \end{pmatrix} \begin{pmatrix} \varepsilon_{ct-1} \\ \vdots \\ \varepsilon_{ct-p} \end{pmatrix} + \begin{pmatrix} \eta_{ct} \\ \vdots \\ 0 \end{pmatrix} = \mathbf{F} \begin{pmatrix} \varepsilon_{ct-1} \\ \vdots \\ \varepsilon_{ct-p} \end{pmatrix} + \begin{pmatrix} \eta_{ct} \\ \vdots \\ 0 \end{pmatrix} = \mathbf{F}^c \begin{pmatrix} \varepsilon_{ct-c} \\ \vdots \\ \varepsilon_{ct-c-p+1} \end{pmatrix} + \mathbf{A} \begin{pmatrix} \eta_{ct} \\ \vdots \\ \eta_{ct-c+1} \\ \mathbf{O}_{(p-c) \times 1} \end{pmatrix}$$

for some  $p \times p$  matrix  $\mathbf{A}$ .

$|\mathbf{\Omega}| \neq 0$ ; the proof is the same as in Appendix A.2.

## APPENDIX B: PROOFS

In  $\text{ARC}(p, c)$ ,

$$\begin{aligned} \phi(L)\varepsilon_t &= \eta_t & \text{for } t = 1, \dots, cT, \\ \varepsilon_t^a &= \sum_{j=1}^c \varepsilon_{t-j+1} & \text{for } t = 1, \dots, cT, \\ \varepsilon_t^c &= \varepsilon_{ct}^a & \text{for } t = 1, \dots, T, \end{aligned} \tag{2}$$

where  $\phi(L) = 1 - \phi_1 L - \cdots - \phi_p L^p$ ,  $\varepsilon_t = 0$  for  $t \leq 0$ , and  $\eta_t \sim NID(0, \sigma_\eta^2)$ .  $L$  is the lag operator. We verify the following lemmas and Theorem 1 so that the identification procedure can be established for the two-stage process of disaggregation. In the proofs, we carefully treat  $\varepsilon_t^c$  and  $\varepsilon_{ct}^a$  because the difference is subtle between the two notations with regard to the lag operator:

$$\nabla \varepsilon_{ct}^a = (1-L)\varepsilon_{ct}^a = \varepsilon_{ct}^a - \varepsilon_{ct-1}^a, \text{ and } \nabla \varepsilon_t^c = (1-L)\varepsilon_t^c = \varepsilon_t^c - \varepsilon_{t-1}^c = \varepsilon_{ct}^a - \varepsilon_{ct-c}^a.$$

*Lemma 1.*  $\varepsilon_t \sim I(d)$  if and only if  $\varepsilon_t^a \sim I(d)$ .

*Proof.* The proof is straightforward from system (2).

*Lemma 2.* Suppose that  $\varepsilon_t^a$  and  $\varepsilon_t^c$  are integrated processes. Then,  $\varepsilon_t^a$  is stationary if and only if  $\varepsilon_t^c$  is stationary.

*Proof.* Suppose that  $\varepsilon_t^a$  is a zero mean stationary process. By Wold's decomposition,  $\varepsilon_t^a = \psi(L)\xi_t$ , where  $\psi(L) = \psi_0 + \psi_1 L + \psi_2 L^2 + \dots$ ,  $\sum_{j=0}^{\infty} \psi_j^2 < \infty$  with  $\psi_0 = 1$ , and  $\xi_t$  is white noise. We have  $\varepsilon_{ct}^a = \psi(L)\xi_{ct}$ ; thus,  $E[\varepsilon_t^c] = E[\psi(L)\xi_{ct}] = 0$  and  $\text{Var}[\varepsilon_t^c] = \text{Var}[\psi(L)\xi_{ct}] = \sum_{j=0}^{\infty} \psi_j^2 \text{Var}[\xi_{ct}] = \sum_{j=0}^{\infty} \psi_j^2$ .  $\text{Var}[\xi_t] = V[\varepsilon_t^a] < \infty$ . Let  $\gamma_j^c = \text{Cov}(\varepsilon_t^c, \varepsilon_{t-j}^c)$  and  $\gamma_j^a = \text{Cov}(\varepsilon_t^a, \varepsilon_{t-j}^a)$ . Then,  $\gamma_j^c = \gamma_{cj}^a$ . Thus,  $\varepsilon_t^c$  is stationary. Conversely, we assume that  $\varepsilon_t^a$  is not stationary. There is an integer,  $d_a \geq 1$ , such that  $\varepsilon_t^a \sim I(d_a)$ . We can assume that  $d_a = 1$  without loss of generality. Then,  $\nabla \varepsilon_t^a$  is stationary, and it is trivial to prove that  $\nabla \varepsilon_{ct}^a$  is also stationary. By Wold's decomposition,  $\nabla \varepsilon_t^a = \psi(L)\kappa_t$ , where  $\psi(1) \neq 0$  and  $\kappa_t$  is white noise. Because  $\nabla \varepsilon_t^c = \sum_{k=0}^{c-1} \nabla \varepsilon_{ct-k}^a = (1 + L + \dots + L^{c-1}) \psi(L)\kappa_{ct}$ ,  $\nabla \varepsilon_t^c$  is stationary. Therefore,  $\nabla \varepsilon_t^c = \theta(L)\eta_t$ , where  $\eta_t$  is white noise with the same variance as  $\kappa_t$  and  $\theta(L) = (1 + L + \dots + L^{c-1})\psi(L)$ . Thus,  $\varepsilon_t^c$  is an integrated process with order 1 because  $\theta(1) \neq 0$ . Consequently,  $\varepsilon_t^c$  is not stationary.

*Theorem 1.* Suppose  $\varepsilon_t$  is an integrated process. The following statements are equivalent.

- (i)  $\varepsilon_t \sim I(d)$ ,                      (ii)  $\varepsilon_t^a \sim I(d)$ ,                      (iii)  $\varepsilon_t^c \sim I(d)$  for  $d \geq 0$ .

*Proof.* (i) is equivalent to (ii) by Lemma 1. (ii) holds if and only if (iii) holds for  $d = 0$  by Lemma 2. Now, we consider the following equation:

$$\nabla^d \mathcal{E}_t^c = \sum_{k_1=0}^{c-1} \dots \sum_{k_d=0}^{c-1} \nabla^d \mathcal{E}_{ct-k_1, \dots, k_d}^a. \quad (3)$$

Because  $\mathcal{E}_t$  is an integrated process,  $\mathcal{E}_t^a$  is an integrated process from the second equation in system (2), and equation (3) indicates that  $\mathcal{E}_t^c$  is also an integrated process. Then, by using equation (3) and Lemma 2, we can verify that  $\nabla^d \mathcal{E}_t^a$  is stationary if and only if  $\nabla^d \mathcal{E}_t^c$  is stationary for  $d \geq 1$ . Consequently, (ii) is equivalent to (iii) for a nonnegative integer  $d$ .

### APPENDIX C: THE INFORMATION LOSS FUNCTION FOR ARC(3, 3)

Figure 1 shows the level curves of  $\text{ILF}(\phi_1, \phi_2, \phi_3)$  at some different values of  $\phi_3$ . As  $\phi_3$  increases, the aggregation effects on the ILF decrease at a different rate according to  $(\phi_1, \phi_2)$ . In particular, the ILF values decrease at a relatively much slower pace if  $\theta < \pi / 2$  and  $R \rightarrow 1$ ; thus, this allows the complex-type effects to gradually emerge in each of the level curves because  $\phi_3$  is close to 1.

Moreover, given  $\phi_3$ , each layer of  $\text{ILF}(\phi_1, \phi_2, \phi_3)$  shares the same pattern as  $\text{ILF}(\phi_1, \phi_2)$ , which indicates that the aggregation effects can explain the general shape of the level curves in Figure 1 as in ARC(2, 3).

Figure 1 shows the direction of changes in the ILF of ARC(3, 3). The level curves shift right to left as  $\phi_3$  increases, which implies that the brunt of forces to decrease the information loss occurs near  $\phi_2 = 0$  along with  $\phi_1 = k$ . This result corresponds to the additive property of ILF.

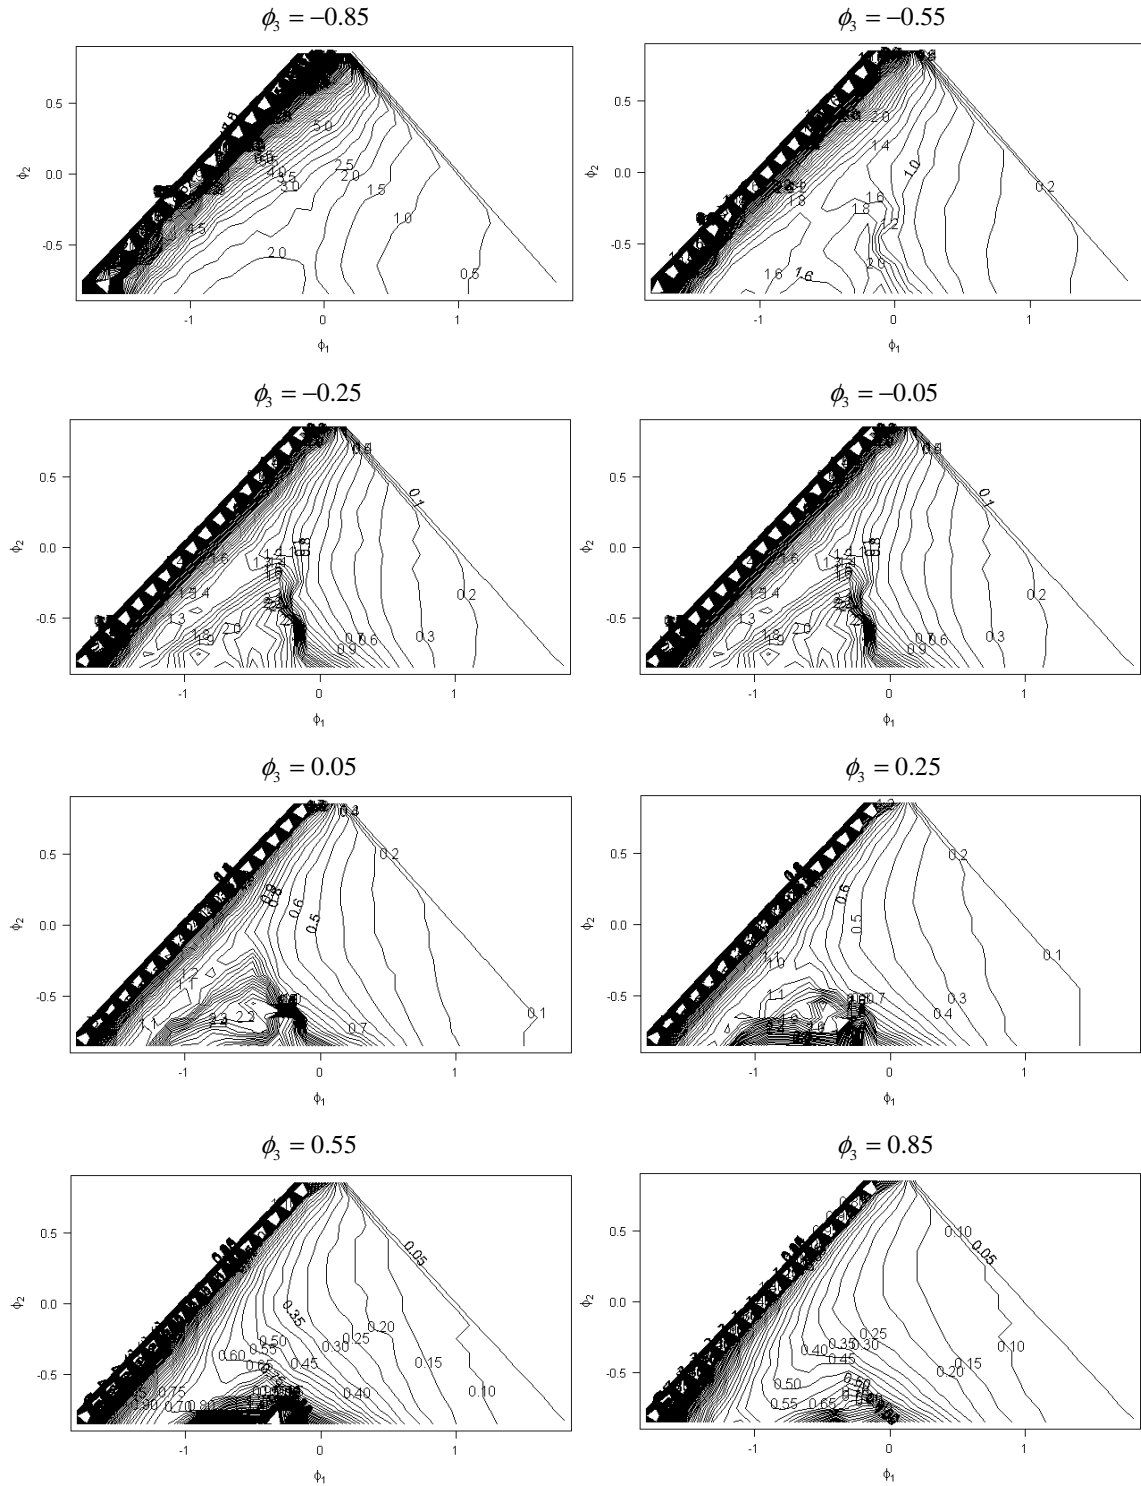

Figure 1. Monte Carlo simulation results for the ILF of ARC(3, 3). Each level curve has a similar pattern to the ILF of ARC(2, 3), which shows that the aggregation effects (Type I–III) can be applied to ARC(3, 3); the information loss function values are decreased along with the line,  $\phi_1 = k$ , as  $\phi_3$  increases. This confirms the additive property of the ILF.



## APPENDIX D: INCONSISTENCY OF THE MLEs OF THE PARAMETERS IN ARC(1,2)

Consider a fraction of the time series,  $\varepsilon_{i,t}$  and  $\varepsilon_{i,t}^c$  for  $t = 1, \dots, 4$ , and  $i = 1, \dots, n$ , where

$\varepsilon_{i,1}^c = \varepsilon_{i,1} + \varepsilon_{i,2}$  and  $\varepsilon_{i,2}^c = \varepsilon_{i,3} + \varepsilon_{i,4}$ . Then,

$$\begin{pmatrix} \varepsilon_{i,1}^c \\ \varepsilon_{i,2}^c \end{pmatrix} \stackrel{iid}{\sim} N \left( \begin{bmatrix} \mu_i \\ \mu_i \end{bmatrix}, \sigma_c^2 \begin{bmatrix} 1 & \rho \\ \rho & 1 \end{bmatrix} \right). \quad (4)$$

$$L(\mu_i, \sigma_c^2; \rho) = \left[ \frac{1}{2\pi\sigma_c^2\sqrt{1-\rho^2}} \right]^n \exp \left[ -\frac{1}{2\sigma_c^2(1-\rho^2)} \sum_{i=1}^n \left[ (\varepsilon_{i,1}^c - \mu_i)^2 - 2\rho(\varepsilon_{i,1}^c - \mu_i)(\varepsilon_{i,2}^c - \mu_i) + (\varepsilon_{i,2}^c - \mu_i)^2 \right] \right],$$

where  $\sigma_c^2 = \text{Var}(\varepsilon_{i,1}^c) = \text{Var}(\varepsilon_{i,2}^c)$ .

We assume that  $-1 < \rho < 1$  is known. Then,

$$\frac{\partial \log L}{\partial \mu_i} = -\frac{1}{2\sigma_c^2(1-\rho^2)} \left[ -2(\varepsilon_{i,1}^c - \mu_i) + 2\rho(\varepsilon_{i,1}^c + \varepsilon_{i,2}^c - 2\mu_i) - 2(\varepsilon_{i,2}^c - \mu_i) \right].$$

$$\frac{\partial \log L}{\partial \mu_i} = 0; \quad \hat{\mu}_i = \frac{\varepsilon_{i,1}^c + \varepsilon_{i,2}^c}{2}.$$

$$\text{Let } \alpha = \sigma_c^2 \sqrt{1-\rho^2}. \text{ Then, } L(\hat{\mu}_i, \alpha; \rho) = \frac{1}{2\pi\alpha^n} \exp \left[ -\frac{1}{2\alpha\sqrt{1-\rho^2}} \sum_{i=1}^n \frac{1+\rho}{2} (\varepsilon_{i,1}^c - \varepsilon_{i,2}^c)^2 \right].$$

$$\frac{\partial \log(\hat{\mu}_i, \alpha; \rho)}{\partial \alpha} = -\frac{n}{\alpha} + \frac{1}{2\alpha^2\sqrt{1-\rho^2}} \sum_{i=1}^n \frac{1+\rho}{2} (\varepsilon_{i,1}^c - \varepsilon_{i,2}^c)^2.$$

$$\frac{\partial \log(\hat{\mu}_i, \alpha; \rho)}{\partial \alpha} = 0; \quad \hat{\alpha} = \frac{1}{2n\sqrt{1-\rho^2}} \sum_{i=1}^n \frac{1+\rho}{2} (\varepsilon_{i,1}^c - \varepsilon_{i,2}^c)^2. \text{ Then,}$$

$$\hat{\sigma}_c^2 = \frac{1}{2n(1-\rho^2)} \sum_{i=1}^n \frac{1+\rho}{2} (\varepsilon_{i,1}^c - \varepsilon_{i,2}^c)^2. \quad (5)$$

From (4)  $\varepsilon_{i,1}^c - \varepsilon_{i,2}^c \stackrel{iid}{\sim} N(0, 2(1-\rho)\sigma_c^2)$ , and from (5),  $\hat{\sigma}_c^2 \xrightarrow{p} \frac{1+\rho}{4(1-\rho^2)} \times 2(1-\rho)\sigma_c^2 = \frac{\sigma_c^2}{2} < \sigma_c^2$  by

the weak law of large numbers. Thus,  $\sigma_c^2$  converges in probability to a constant number that is less than  $\sigma_c^2$ .

In ARC(1, 2):

$$\begin{aligned}\varepsilon_t &= \phi \varepsilon_{t-1} + \eta_t & \text{for } t = 1, \dots, cT, \\ \varepsilon_t^c &= \varepsilon_{2t} + \varepsilon_{2t-1} & \text{for } t = 1, \dots, T,\end{aligned}$$

where  $\eta_t \sim NID(0, \sigma_\eta^2)$ .  $\sigma_c^2 = \text{Var}(\varepsilon_t^c) = \text{Var}(\varepsilon_{2t} + \varepsilon_{2t-1}) = 2(1 + \phi) \text{Var}(\varepsilon_t) = 2(1 + \phi) \frac{\sigma_\eta^2}{1 - \phi^2} = \frac{2\sigma_\eta^2}{1 - \phi}$ .

$\frac{\partial \sigma_c^2}{\partial \phi} = \frac{2\sigma_\eta^2}{(1 - \phi)^2} > 0$  and  $\frac{\partial \sigma_c^2}{\partial \sigma_\eta^2} = \frac{2}{1 - \phi} > 0$ , where  $-1 < \phi < 1$ ; thus,  $\sigma_c^2$  increases in  $\phi$  and  $\sigma_\eta^2$ . Let

$\sigma_c^2 = f(\phi)$ , where  $f \in C^\infty(-1, 1)$  and  $f' > 0$ . Then,  $\hat{\phi} = f^{-1}(\hat{\sigma}_c^2)$ .

$$\hat{\phi} = f^{-1}(\hat{\sigma}_c^2) \xrightarrow{p} f^{-1}\left(\frac{\sigma_c^2}{2}\right) = \alpha_\phi f^{-1}(\sigma_c^2) < f^{-1}(\sigma_c^2) = \phi, \quad (6)$$

for some  $0 < \alpha_\phi < 1$ . Similarly,  $\hat{\sigma}_\eta^2 \xrightarrow{p} \alpha_\eta \sigma_\eta^2$ , for some  $0 < \alpha_\eta < 1$ . Consequently, in this fraction of the time series, the MLEs of  $\phi$  and  $\sigma_\eta^2$  converge to some constants that are less than the true values. This result aligns with Neyman and Scott's (1948) proposition that maximum likelihood estimates of the structural parameters related to a partially consistent series of observations need not be consistent. It is analytically intractable to consider the entire time series to show this phenomenon. Table 4 in the article, however, confirms that the Monte Carlo simulations provide the maximum likelihood estimates of  $\phi$  and  $\sigma_\eta^2$  that are less than the true values.

## APPENDIX E: TEST RESULTS

Table 1. Unit root and cointegration tests: Real retail and food services sales (RFS), personal consumption expenditure (PCE), and unemployment rate (UER) of the United States (1992.1–2004.12)

| Series | Unit Root Test |           |                         | Cointegration Rank Test |            |                       |                   |           |            |                       |                   |
|--------|----------------|-----------|-------------------------|-------------------------|------------|-----------------------|-------------------|-----------|------------|-----------------------|-------------------|
|        | Monthly        | Quarterly | No. of CEs <sup>a</sup> | Monthly                 |            |                       |                   | Quarterly |            |                       |                   |
|        | Dickey–Fuller  |           |                         | Trace                   | Eigenvalue | Cointegrating Vectors |                   | Trace     | Eigenvalue | Cointegrating Vectors |                   |
| RFS    | -2.579         | -2.019    | None                    | 54.876*                 | 0.215*     | 1.000                 | 0.000             | 44.066*   | 0.412*     | 1.000                 | 0.000             |
| PCE    | -0.579         | -0.951    | At most 1               | 17.908*                 | 0.108*     | 0.000                 | 1.000             | 18.590*   | 0.265*     | 0.000                 | 1.000             |
| UER    | -1.081         | -2.180    | At most 2               | 0.454                   | 0.003      | -0.114<br>(0.225)     | -0.039<br>(0.021) | 3.827     | 0.077      | -0.372<br>(0.204)     | -0.062<br>(0.020) |
|        | 1              | 2         | No. of lags             | 2                       |            |                       |                   | 3         |            |                       |                   |

NOTE: The asterisk signifies rejection of the corresponding null hypothesis at the 5% level of significance. <sup>a</sup> The number of cointegrating equations.

## REFERENCES

- Chow, G. C., and Lin, A. (1971), "Best Linear Unbiased Interpolation, Distribution, and Extrapolation of Time Series by Related Series," *Review of Economics and Statistics*, 53, 372-375.
- Johansen, S. (1991), "Estimation and Hypothesis Testing of Cointegration Vectors in Gaussian Vector Autoregressive Models," *Econometrica*, 59(6), 1551-1580.
- Joo, Y., and Jun, D. (1997), "State Space Trend-Cycle Decomposition of the ARIMA(1,1,1) Process," *Journal of Forecasting*, 16, 411-424.
- Jun, D. B., Kim, D. S., Park, S., and Park, M. H. (2012), "Parameter Space Restrictions in State Space Models," *Journal of Forecasting*, 31, 109-123.
- Luenberger, D. G. (1979), *Introduction to Dynamic Systems: Theory, Models, and Applications*, New York: John Wiley & Sons.
- Neyman, J., and Scott, E. L. (1948). "Consistent Estimates Based on Partially Consistent Observations," *Econometrica*, 16, 1-32.
